1 **Exposure during embryonic development to Roundup® Power 2.0**  
2 **affects lateralization, level of activity and growth, but not defensive**  
3 **behaviour of marsh frog tadpoles**

4  
5 Alessandro Bolis <sup>a</sup>, Andrea Gazzola <sup>a</sup>, Daniele Pellitteri-Rosa <sup>a</sup>, Anita Colombo <sup>b</sup>, Patrizia Bonfanti  
6 <sup>b</sup>, Adriana Bellati <sup>a,\*</sup>

7  
8 <sup>a</sup> Department of Earth and Environmental Sciences, University of Pavia, Via Ferrata 9, 27100  
9 Pavia, Italy

10  
11 <sup>b</sup> Department of Environmental and Earth Sciences, Research Centre POLARIS, University of  
12 Milano Bicocca, P.zza della Scienza 1, 20126 Milano, Italy

13  
14 \* corresponding author: Adriana Bellati, Department of Earth and Environmental Sciences,  
15 University of Pavia, Via Ferrata 9, 27100 Pavia, Italy; tel: +39 0382986839; e-mail:  
16 [adriana.bellati@unipv.it](mailto:adriana.bellati@unipv.it)

17 **ABSTRACT**

18 As glyphosate-based herbicides, sold under the commercial name Roundup®, represent the most  
19 used herbicides in the world, contamination of the freshwater environment by glyphosate has  
20 become a widespread issue. In Italy, glyphosate was detected in half of the surface waters  
21 monitoring sites and its concentrations were higher than environmental quality standards in 24.5%  
22 of them. It can last from days to months in water, leading to exposure for aquatic organisms and  
23 specifically to amphibians' larvae that develop in shallow water bodies with proven effects to  
24 development and behaviour. In this study, we tested the effects of a 96h exposure during embryonic  
25 development of marsh frog's tadpoles to three ecologically relevant Roundup® Power 2.0  
26 concentrations. As expected, given the low concentrations tested, no mortality was observed.  
27 Morphological measurements highlighted a reduction in the total length in tadpoles exposed to 7.6  
28 mg a.e./L, while an increase was observed at lower concentrations of 0.7 and 3.1 mg a.e./L  
29 compared to control group. Tadpoles raised in 7.6 mg a.e./L also showed a smaller tail membrane  
30 than those raised in the control solution. Regarding behaviour, we tested tadpoles in two different  
31 sessions (Gosner stages 25 and 28/29) for lateralization, antipredator response and basal activity.  
32 Lower intensity of lateralization was detected in tadpoles raised at the highest Roundup®  
33 concentration in the first session of observation, while no significant difference among treatments  
34 was observed in the second one. In both sessions, effects of glyphosate embryonic exposure on  
35 antipredator response, measured as the proportional change in activity after the injection of tadpole-  
36 fed predator (*Anax imperator*) cue, were not detected. Tadpoles exposed during embryonic  
37 development to Roundup® exhibited lower basal activity than the control group, with the strongest  
38 reduction for the 7.6 mg a.e./L treatment. Our results reinforce the concern of glyphosate  
39 contamination impact on amphibians.

40

41 **KEYWORDS**

42 Glyphosate, Amphibians, Morphology, Laterality, Antipredator response

## 43 INTRODUCTION

44 Glyphosate-based herbicides (GBHs) are between the most sold broad-spectrum herbicides in the  
45 world (Duke and Powles, 2008), whose use reaches nearly 100 million kilograms on an annual basis  
46 (Grube et al., 2011). The active ingredient, glyphosate, appears in several alternative formulations,  
47 altogether known under the commercial name Roundup® (Monsanto Co., St. Louis, MO, USA).  
48 Glyphosate use spans different applications, from no-tillage farming and conventional agriculture to  
49 non-cultivated areas, forest management and private gardening (Dill, 2005; Dill et al., 2010). Its use  
50 is approved until 2022 by the European Union (European Commission, 2017), however in Italy its  
51 application is restricted during harvest and threshing, and banned in public gardens and parks,  
52 schools, private gardening and health facilities (Italian Ministry of Health, 2016). Although the  
53 aforementioned restrictions, a recent report concerning surface waters pesticide contamination  
54 highlighted the presence of this molecule in 47.4% of the Surface Waters Monitoring Sites in Italy  
55 (SWMS), with its concentration exceeding the Environmental Quality Standards (EQS) in 24.5% of  
56 them (ISPRA, 2018).

57 As this molecule has been engineered to kill plants, specifically post-emergent leaves and  
58 grasses, glyphosate is considered to have low mammalian toxicity, being “practically non-toxic” for  
59 bees, birds and most aquatic organisms, according to the World Health Organization/Food and  
60 Agriculture Organization (Lajmanovich et al., 2011). Microorganism degrade the active ingredient  
61 into its metabolite aminomethylphosphonic acid (AMPA), which is eventually oxidized into carbon  
62 dioxide, in both soil and water. Since the rate of degradation is strictly dependent on physical (e.g.  
63 temperature) and chemical (e.g. pH) environmental conditions, glyphosate’s half-life can last from  
64 days to months (e.g. 7–70 days in the water; Giesy et al., 2000), leading to possible chronic  
65 exposures for organisms living in certain environments (Feng et al., 1990; Borggaard and Gimsing,  
66 2008; Bailey et al., 2018). GBH formulations are generally more toxic than glyphosate by itself,  
67 mainly due to the presence of surfactants (e.g. polyoxyethylene - POE, polyethoxylated tallow  
68 amine - POEA). Previous studies showed that the toxicity of GBHs to aquatic organisms is largely

69 caused by the surfactant in the mixture (Edginton et al., 2004; Moore et al., 2012). These substances  
70 may not only cause toxicity by themselves, but also facilitate the penetration of the active ingredient  
71 in animal cells causing teratogenic effects, as shown in amphibian embryos and tadpoles of several  
72 species (Borggaard and Gimsing, 2008; Paganelli et al., 2010; Bonfanti et al., 2018; Gill et al.,  
73 2018).

74 To date, GBHs have been proved to affect amphibians' development through growth  
75 retardation and weight reduction during larval stages, especially in anurans (Smith, 2001; Cauble  
76 and Wagner, 2005; Lanctôt et al., 2014; Navarro-Martín et al., 2014). Furthermore, GBHs have  
77 been shown to alter behaviour in aquatic organisms, like fishes and amphibians, involving  
78 locomotion, memory, visual and olfactory senses and antipredator responses (Tierney et al., 2006;  
79 Moore et al., 2015; Besson et al., 2017; Bridi et al., 2017; Mikò et al., 2017). In the poecilid  
80 *Cnesterodon decemmaculatus*, exposure to GBHs during development has been proven to cause a  
81 significant inhibitory effect on AChE (acetylcholinesterase) activity in the tail (Menéndez-Helman  
82 et al., 2012). The inhibition of this enzyme, involved in the breakdown of the neurotransmitter  
83 acetylcholine in muscle and nerve synapses and thus in the end of a transmission of a neural  
84 impulse (Zimmerman and Soreq, 2006; Tripathi and Srivastava, 2010), leads to a possible reduction  
85 of basal activity. Nonetheless, another study demonstrated that AChE activity increases in tadpoles  
86 of the marsh frog *Pelophylax ridibundus*, the green toad *Bufo viridis*, and the African clawed  
87 toad *Xenopus laevis* exposed to GBH formulations (Güngördü, 2013). This finding however is still  
88 unmatched by other studies, at least for anurans since glyphosate instead decreased AChE activity  
89 in tadpoles of the toad *Rhinella arenarum* in a study by Lajmanovich and colleagues (2011).

90 An additional negative effect of herbicide water contamination could be lateralization  
91 impairment (Besson et al., 2017). Brain lateralization is the difference between the activity of the  
92 right and left hemisphere in the execution of several tasks, implying the preferential use of one body  
93 portion over the other (Davidson and Hugdahl, 1996; Bisazza et al., 1998). Laterality is thought to  
94 augment cognitive abilities, by optimizing the processing of information in the two-separate brain

95 hemispheres, thus enhancing the ability to make decisions when facing novel multi-sensory stimuli  
96 (Vallortigara and Rogers, 2005; Salva et al., 2012). Defence against predators is a well-known  
97 lateralized behaviour in vertebrates, as the recognition and escape performances seem to depend on  
98 the side of appearance of a predatory threat (Siniscalchi et al., 2010; Shibasaki et al., 2014). Fishes,  
99 birds, and reptiles have shown eye preference when keeping track of predators or choosing for a  
100 prevalent escape direction in predatory risk conditions (Sovrano et al., 2005; Koboroff et al., 2008;  
101 Martín et al., 2010; Pellitteri-Rosa and Gazzola, 2018).

102 In larval amphibians, defensive behaviour is generally activated by chemical (olfactory)  
103 cues, released in the water both by injured conspecifics (alarm cue) as well as by predators  
104 (kairomones). It has been shown that glyphosate negatively affects the functionality of the olfactory  
105 system by inactivating the chemical cues conveying information on predation risk, thus inhibiting  
106 predator recognition, or by lowering the learning ability of tadpoles (Mandrillon and Saglio, 2007a,  
107 b; Moore et al., 2015). An altered olfactory system could in turn weaken defensive responses and  
108 negatively affect tadpoles' survival in their natural environment.

109 Behavioural alterations may appear when tadpoles develop in the contaminated medium (i.e.  
110 chronic exposure), or alternatively when adults are exposed, even briefly, to the substance (i.e.  
111 acute-transitory exposure). Therefore, contaminants may affect amphibians at every life stage, with  
112 negative effect on growth and reproduction, and finally survival of the single individual likewise the  
113 entire population (Relyea, 2005; Gill et al., 2018). The complex life cycle of anurans, which shifts  
114 their biological cycle from water to terrestrial habitats and the assumption that several  
115 environmental cues experienced during embryonic development can affect the range of  
116 physiological and behavioural responses available as adults (Dufty et al., 2002), makes them an  
117 ideal candidate to explore the effects of pollutants during development.

118 In this study, we explored the effects of glyphosate on the morphology and some fitness-  
119 related behavioural traits in tadpoles of a widely distributed European anuran, the marsh frog *P.*  
120 *ridibundus*, by exposing embryos to different ecologically relevant concentrations of the

121 commercial GBH Roundup® Power 2.0 (Monsanto Co., St. Louis, MO, USA). *P. ridibundus* eggs  
122 are frequently found in areas with vegetation, wetlands, agricultural areas, and urban regions where  
123 the presence of pesticides could be significant. Our aims were to investigate the possible effects of  
124 early (embryonic) exposure to RU-PW on: (1) total length and tail depth, to detect growth  
125 retardation; (2) lateralization, as a proxy of the correct development of the nervous system of the  
126 tadpole; (3) level of activity (both basal and in the presence of a predatory stimulus), to infer the  
127 ability of the individual to correctly cope with important environmental pressures (i.e. predation).  
128 Previous studies showed that *P. ridibundus* tadpoles are more resistant to glyphosate-based  
129 herbicide than other species of anurans (Güngördü, 2013). Nonetheless, adults of this species  
130 demonstrated a slight increase in the hepatosomatic index (HSI) when exposed via intraperitoneal to  
131  $0.138 \times 10^{-3}$  mL Roundup®/g per body mass (Păunescu and Ponopal, 2011). According to previous  
132 findings, we expect to find a relationship between glyphosate exposure and both tadpoles  
133 morphological and behavioural traits. At the same time, we also expect these effects to only appear  
134 at particular developmental stages and have little or no effect on the long-term survival of  
135 individuals, as a result of general high resistance of the species to environmental stressors, like  
136 xenobiotics.

137

## 138 **MATERIALS AND METHODS**

139

### 140 *Animals collection and breeding*

141

142 The marsh frog is an anuran endemic to Central and Eastern Europe. In Italy, native populations of  
143 this taxon only occur at the edge of the Northern-Eastern region of Friuli-Venezia Giulia (Lanza et  
144 al., 2006). Nonetheless, several populations of this frog had been introduced in Italy for edible  
145 purposes. According to the Environmental Impact Classification of Alien Taxa (EICAT) of the  
146 International Union for Conservation of Nature (IUCN), the species is considered one of the

147 invasive species with the highest potential to impact native species diversity worldwide, because of  
148 its ability to occupy a wide variety of habitats on one hand, and to hybridize with native taxa, thus  
149 producing viable and fertile hybrids, on the other (Kumschick et al., 2017).

150         Adult marsh frogs were collected at night on June 15<sup>th</sup>, 2018, from an artificial pond situated  
151 in the municipality of Mezzolombardo (46.19°N, 11.09°E, TN, Italy). Here, previous surveys had  
152 highlighted the presence of water frogs that were ascribed to *P. ridibundus* following molecular  
153 analysis. Frogs were captured using fishing nets and transported to the laboratory of the Department  
154 of Earth and Environmental Sciences of the University of Pavia. Until the beginning of the 96h  
155 exposure, frogs were kept in plastic tanks filled with dechlorinated tap water and fed with crickets  
156 (*Acheta domesticus*) ad libitum.

157         Embryos of *P. ridibundus* used in the 96h exposure were obtained through in vitro  
158 fertilization following the procedure for anuran breeding provided by Pruvost (2013), and Berger et  
159 al. (1994) with modifications (Bonfanti et al., 2004). Specifically, 24 h before egg collection, we  
160 triggered ovulation stimulation by injecting both females and males (n = 6) with LHRH hormone  
161 (BachemH-7525, Bubendorf, Switzerland) at a concentration of 2 mg in 100 mL Holtfreter's  
162 solution (Holtfreter, 1944). Individuals were injected into the dorsal lymph sac 10 µl/g of body  
163 mass of hormone.

164         The male selected for the crossing was euthanized in a MS-222 solution (Sigma A-5040, St.  
165 Gallen, Switzerland) at 2 mg/L. Testes were removed, put in 2 mL of cold DBT solution (Tris-HCL  
166 10 m, pH 7.5) and minced to obtain a sperm suspension. Egg groups, obtained by gently massaging  
167 the abdominal region of the females, were collected in 90-mm plastic Petri dishes and immediately  
168 inseminated with sperm suspension; after 2 min, 30 ml of Holtfreter's solution were added to each  
169 Petri dish. Successful insemination was detected when after 30 min of incubation at 25 °C all the  
170 eggs were oriented with the dark side (animal pole) up. Embryos (Gosner stages 4-5) were selected  
171 under a stereomicroscope and the jelly coat was removed by swirling the embryos for 1-2 min in a  
172 2.25% L cysteine solution (pH 8.1). All the fertilizations were performed on June 18<sup>th</sup>, 2018.

173 We collected five dragonfly larvae (*Anax imperator*) from a small pond situated in the  
174 botanical garden in Pavia (45.18°N, 9.15°E, Italy) on July 2<sup>nd</sup>, 2018. They were individually kept in  
175 800 mL cups filled with 500 mL of aged tap water and wooden sticks as perching sites. These  
176 animals were later used for behavioural trials.

177

178 *Roundup® Power 2.0 solutions*

179

180 Roundup® Power 2.0 (Monsanto Italia S.P.A.), referred to as RU-PW, was formulated with a  
181 guarantee of 360 g glyphosate acid equivalent (a.e.) per litre present as the potassium salt (CAS RN  
182 70901-12-1), six percent by volume of ethoxylated ether alkyl ammine (CAS RN 68478-96-6) and  
183 58.5% water and other ingredients not specified by the producer.

184 A stock solution of RU-PW at nominal concentration of 100 mg a.e./L using FETAX  
185 solution was prepared. In according to previous experiments, we opted to use FETAX solution as  
186 control, since it is the optimal solution for the development of water frogs. The composition in  
187 mg/L was: NaCl 625, NaHCO<sub>3</sub> 96, KCl 30, CaCl<sub>2</sub> 15, CaSO<sub>4</sub>-2H<sub>2</sub>O 60, and MgSO<sub>4</sub> 70, pH 7.5–8.5  
188 (Dawson and Bantle, 1987).

189

190 *96h exposure test*

191

192 Normally-cleaved embryos at the midblastula stage (Gosner stage 8; Gosner, 1960) five hours post  
193 fertilization (hpf), were selected from each female (n = 2), assigned to the experimental groups (n =  
194 15 per group) and placed in covered Petri dishes containing 40 mL of control (FETAX) or RU-PW  
195 solution. For each treatment (three RU-PW concentrations and control) and for each female, five  
196 replicas were performed for a total of 300 embryos per female.

197 RU-PW concentrations used for the 96h exposure were 0.7 mg a.e./L, 3.1 mg a.e./L and 7.6  
198 mg a.e./L.; control treatment was represented by FETAX solution. Each experimental concentration



199 corresponded to one of the following three different scenarios: environmental concentration of the  
200 herbicide without intervention (0.7 mg a.e./L), concentration occurring shortly after the application  
201 of the herbicide (3.1 mg a.e./L), and concentration estimated in worst-case scenarios (e.g. direct  
202 spraying in a flooded field, 7.6 mg a.e./L) (Wagner, 2013). Embryos were incubated in a  
203 thermostatic chamber at  $25 \pm 0.5$  °C and exposure solutions were renewed every 24 h (semi-static  
204 conditions). The selected concentrations should not cause different mortality rates with respect to  
205 the control group, since the estimated LC50 for RU-PW is 24.75 mg a.e./L for *Xenopus laevis*  
206 (Bonfanti et al., 2018), a species considered more sensitive to Roundup than marsh frogs  
207 (Güngördü, 2013).

208

#### 209 *Morphological measurements*

210

211 At the end of the exposure period (96 hpf) we randomly selected a total of 220 tadpoles equally  
212 balanced both for treatment and female. They were euthanized and formalin fixed and photographed  
213 through a stereomicroscope equipped with a camera (AxioCam ERc5s) to estimate growth  
214 retardation by measuring the total length and maximum tail height (Altig, 2017), using the  
215 digitizing software AxioVision. Remaining individuals were reared in 16 plastic tanks (2 tanks per  
216 treatment and female) filled with dechlorinated tap water (8 L), under natural light conditions. After  
217 hatching, tadpoles were fed with rabbit food, and reunited in four plastic tanks according to  
218 treatment (control, 0.7 mg a.e./L, 3.1 mg a.e./L, 7.60 mg a.e./L solutions) on July 2<sup>nd</sup>.

219

#### 220 *Behavioural trials: rotational preference, antipredator response and basal activity*

221

222 We began the behavioural trials when tadpoles reached Gosner developmental stage 25 on July 3<sup>rd</sup>.  
223 We recorded the activity of 200 tadpoles (n = 50 from each treatment) in the span of three days,  
224 from 9:00 am to 4:00 pm. The tests consisted in recording the activity of individuals for 15 min,

225 while measuring three distinct behavioural variables: rotational preference (i.e. lateralization),  
226 antipredator response and basal activity.

227 Before starting the trials, each individual was placed in 100 × 20 mm Petri dishes filled with  
228 60 ml of well-aged tap water for a period of acclimation (15 min). To measure rotational preference,  
229 we recorded the time spent swimming in both clockwise and counterclockwise direction during the  
230 first 10 min of the test. This is a well-established method for assessing lateralization in tadpoles  
231 (Vandenberg and Levin, 2013; Lucon-Xiccato et al., 2016). Only clockwise and counterclockwise  
232 movements made in the outer portion of the Petri dishes were measured. We recorded lateralization  
233 only when tadpoles' distance from the centre of the Petri dishes was at least 3 cm. Tadpoles that did  
234 not move for the whole test were excluded from the analysis (12 tadpoles in the first session and no  
235 tadpoles in the second one).

236 Tadpoles of many frog species are known to reduce level of activity after being exposed to  
237 predatory cues, in particular when chemicals are produced by a familiar predator preying upon  
238 conspecific prey (Ferrari and Chivers, 2009). Accordingly, for each trial we collected 1 mL of water  
239 from four different plastic tanks (500 ml) containing *Anax imperator* larvae, which were fed on  
240 conspecific tadpoles (one per dragonfly larvae) at least one hour before the beginning of the  
241 recording sessions. This procedure allowed us to have freshly produced odours, and to use them as a  
242 reliable olfactory signal consisting in predatory kairomones released by predators, and tadpoles'  
243 alarm cue (Hetttyey et al., 2015).

244 The antipredator response was estimated by recording the amount of time (in seconds) the  
245 tadpoles were active in a five minutes time span both before and after the injection of the stimulus,  
246 which consisted in 1 mL of either water (blank) or alarm cue. In order to detect possible differences  
247 within tadpoles from different developmental treatment in antipredator responses, the movement  
248 after and before the injection were compared. We considered the activity recorded before the  
249 injection of water or alarm cue, measured in a 5 min period, as the basal activity level.

250 Three weeks later, when tadpoles reached Gosner stage 28/29, we repeated the experiment  
251 using the same experimental protocol as explained above and recorded the activity of 80 tadpoles ( $n$   
252 = 20, from each developmental treatment).

253

#### 254 *Statistical analysis*

255

256 We applied the non-parametric test Kruskal-Wallis to investigate differences in the total length,  
257 and Dunn's test of multiple comparisons with p-values adjusted with the Benjamini-Hochberg  
258 method to compare control with other treatments. We then compared maximum tail height in  
259 tadpoles exposed to RU-PW to those raised in the control solution with a robust bootstrap version  
260 of ANCOVA for trimmed means with the total length as covariate (bootstrap = 10,000, 20%  
261 trimmed means) using the R package WRS2, function: *ancboot* (Wilcox and Mair, 2016). This test  
262 compares trimmed means at different points along the covariate and finds five points where the  
263 slopes are roughly the same, then it compares the trimmed means at these points and explore the  
264 possible differences. Since this analysis can be performed only when comparing two groups, the  
265 control group was compared to the three RU-PW treatments in three different analysis.

266 Rotational preference was analysed through two parameters often used to study  
267 lateralization (Cantalupo et al., 1995). Lateralization directionality ( $L_R$  index) was calculated with  
268 the following formula:  $(\text{clockwise swimming time} - \text{counterclockwise swimming time}) / (\text{clockwise}$   
269  $\text{swimming time} + \text{counterclockwise swimming time}) \times 100$ . Moreover, the intensity of lateralization  
270 ( $L_A$  index) equals to the absolute value of  $L_R$  ( $L_A = |L_R|$ ). We compared both indexes between  
271 tadpoles from different developmental treatments using a bootstrap version of one-way ANOVA for  
272 trimmed means (R package: WRS, function: *t1waybt*), both for the first and second session  
273 (bootstrap = 10,000, 20% trimmed means; Wilcox, 2011). We then compared indexes between the  
274 two experimental sessions with a two-way ANOVA for trimmed means (R package: WRS2,  
275 function: *t2way*). Post-hoc tests were executed with *lincomb* function (R package: WRS).

276           Regarding the antipredator response, we calculated change in activity using the following  
277 formula: (movement after – movement before) / (movement before) the injection of the stimulus. In  
278 order to explore the disturbance effect of the injection procedure we used a non-parametric  
279 Wilcoxon rank sum test to compare the tadpoles mean level of activity before and after the water  
280 injection for each treatment in both experimental sessions. A two-way ANOVA for trimmed means  
281 was used to compare change in activity between groups and experimental session (R package:  
282 WRS2, function: *t2way*). For each session, we used one-way ANOVA for trimmed means to  
283 explore differences among embryonic treatments for the level of activity.

284           Finally, we used a linear model (*lm*) to explore differences in the basal activity level and  
285 included embryonic treatment, experimental session and their interaction as main predictors.  
286 Planned comparisons with control group in each session were extracted from the model with  
287 “emmeans” R-package and no *p*-value correction (Lenth, 2018).

288

## 289 **RESULTS**

290

### 291 *Morphology*

292

293 We detected significant differences between treatments regarding the measured morphological  
294 parameters (Fig. 1). The total length was different between embryonic treatments ( $X^2 = 50.0$ ,  $P <$   
295  $0.001$ ). Tadpoles exposed to low concentrations RU-PW (0.7 and 3.1 mg a.e./L) showed a higher  
296 total length than those raised in the control solution ( $Z = -3.01$ ,  $P = 0.003$ ;  $Z = -3.27$ ,  $P = 0.002$   
297 respectively). On the contrary, tadpoles which developed in the highest concentration (7.6 mg  
298 a.e./L) showed a lower total length compared to the control group ( $Z = 2.26$ ,  $P = 0.008$ ). Results  
299 from robust bootstrap version of ANCOVA for trimmed means showed that significative  
300 differences in the maximum tail height emerged only for the highest glyphosate treatment (7.6 mg  
301 a.e./L) in comparison to the control group (Table 1).

302

303 *Lateralization*

304

305 In the first behavioural session, carried out at Gosner stage 25,  $L_A$  index was not equal among  
306 developmental treatments ( $F = 3.34$ ,  $P = 0.024$ ,  $d = 0.28$ ; Fig. 3). The  $L_A$  index was significantly  
307 higher in the control group compared to tadpoles raised in the highest treatment concentration tested  
308 (7.6 mg a.e./L;  $\Psi = 22.22$ ,  $P = 0.003$ ), however no significant difference was detected between  
309 control and both 0.7 and 3.1 mg a.e./L (lower  $p$ -value:  $\Psi = 13.25$ ,  $P = 0.07$ ). In the second session  
310 (Gosner stage 28/29), statistically significant differences among treatments were no longer observed  
311 ( $F = 1.66$ ,  $P = 0.20$ ,  $d = 0.33$ ). The global analysis for trimmed means showed a significant effect  
312 for the embryonic treatment ( $F = 10.48$ ,  $P = 0.02$ ) and for the experimental session ( $F = 62.32$ ,  $P =$   
313  $0.001$ ), but not for the interaction of the two ( $F = 4.76$ ,  $P = 0.20$ ; Fig. 2). In all four groups  $L_A$  index  
314 values decreased from the first to the second session (Fig. 2).

315 Tadpoles did not exhibit directional preference for  $L_R$  index, and we did not observe  
316 differences between the treatment groups in both sessions (Session 1:  $F = 0.46$ ,  $P = 0.69$ ,  $d = 0.11$ ;  
317 Session 2:  $F = 0.27$ ,  $P = 0.83$ ,  $d = 0.15$ ).

318

319 *Antipredator response*

320

321 In both sessions (Gosner stages 25 and 28/29), the level of activity before and after the injection of  
322 water stimulus was not significantly different for all treatments (highest difference:  $W = 210$ ,  $P =$   
323  $0.11$ ; Fig. 3a and 3c), thus showing a negligible disturbance effect of the injection procedure. The  
324 sole exception was represented by 3.1 mg a.e./L treatment in the second session, which significantly  
325 reduced activity level after the water stimulus injection ( $W = 21$ ,  $P = 0.02$ ; Fig. 3c). Concerning the  
326 antipredator response, we did not detect any significant difference in tadpoles' activity change  
327 among embryonic treatments after the injection of the stimulus (either water or predatory cue;  $P =$

328 0.75; Fig. 3b and 3d). Nevertheless, chemical stimulus and experimental session seemed to have a  
329 significant effect for the proportional change in the level of activity (value= 1087.24,  $P < 0.001$  and  
330 value=5.36,  $P = 0.02$ , respectively). All groups showed a strong significant decrease in the level of  
331 activity after the injection of predatory cue in comparison to water injection (Session 1:  $F = 979.22$ ,  
332  $P < 0.001$ ; Session 2:  $F = 1721.90$ ,  $P < 0.001$ ). No significant interaction was detected between  
333 embryonic treatment and the type of stimulus injected (Session 1:  $F = 1.45$ ,  $P = 0.70$ ; Session 2:  $F =$   
334 2.43,  $P = 0.53$ ).

335

### 336 *Basal activity*

337

338 The global linear model highlighted a significant interaction between embryonic treatment and  
339 experimental session ( $F = 3.23$ ,  $P = 0.02$ ; Fig. 4). In the first session (Gosner stage 25) we observed  
340 that basal activity, measured in a 5 min time span, was significantly higher in tadpoles raised in the  
341 control solution than in those exposed to the herbicide ( $F = 5.62$ ,  $P = 0.001$ ). In the first session, the  
342 intermediate RU-PW concentration groups (0.7 and 3.1 mg a.e./L) showed a significant reduction in  
343 the basal activity compared to the control (t.ratio = -2.54,  $P = 0.01$  and t.ratio = -2.04,  $P = 0.04$ ,  
344 respectively). Tadpoles exposed to the highest concentration of the herbicide (7.6 mg a.e./L)  
345 exhibited the strongest reduction in the basal level of activity (t.ratio = - 4.23,  $P < 0.001$ ) when  
346 matched to the control group. In the second session (Gosner stage 28/29), tadpoles raised with RU-  
347 PW were overall more active than the control group but no significant difference was detected  
348 (highest difference: t.ratio = -1.79,  $P = 0.07$ ).

349

## 350 **DISCUSSION**

351

352 Our study clearly supports the hypothesis that GBHs in freshwater habitat could affect the life cycle  
353 of marsh frog's tadpoles in terms of development, lateralization and activity level, all factors closely

354 related to the ability of the larvae to cope with environmental pressures. As a general consideration,  
355 the absence of mortality rate in the different groups tested (both control and exposed) indicates a  
356 good quality of the experimental conditions and confirms the sub-lethal concentrations of GBHs.  
357 Similarly, no mortality has been observed in experiments using tadpoles exposed to ecologically  
358 relevant concentrations of several herbicides (Dornelles and Oliveira, 2014; Wilkens et al., 2019).

359

### 360 *Effects of RU-PW on morphological traits*

361

362 Analysis of the morphological parameters revealed that growth of marsh frog tadpoles was affected  
363 by ecologically relevant glyphosate concentrations after the 96h laboratory exposure. Tadpoles  
364 exposed to low and intermediate concentrations seemed longer than control, pointing to a growth  
365 hastening in a low pollution levels scenario, while those exposed to the highest concentration  
366 appeared significantly shorter. This result could be interpreted as a growth retardation in highly  
367 polluted environments. This hormetic trend in tadpoles' development has already been observed for  
368 different pesticides and heavy metals (James and Little, 2003; Smith et al., 2004; Nations et al.,  
369 2011, 2015).

370 In the first scenario, we can assume that the environmental stressor represented by the  
371 pollutant bursts tadpole's development in terms of adaptive stress response, increasing length,  
372 which would eventually favour movement away from the unsuitable – polluted – medium. On the  
373 other hand, an indirect effect of low GBHs water contamination could consist in a faster  
374 development and an early metamorphosis at smaller size, with obvious negative outcomes in terms  
375 of higher predation risk and possible lower reproductive success in later-life stages (Altwegg and  
376 Reyer, 2003; Cauble and Wagner, 2005).

377 RU-PW caused a general growth retardation for tadpoles raised in 7.6 mg a.e./L, for both  
378 total length and maximum tail height, thus producing shorter individuals with thinner tails (Fig. 5).  
379 This could be due to the energetic cost of detoxification, reducing the amount of available energy

380 for growing and metamorphosis. Wilkens and colleagues (2019) recently demonstrated an effect of  
381 two xenobiotics (sulfentrazone and glyphosate) and their blend on metabolic rates, oxidative stress  
382 and plasma corticosterone circulating level in tadpoles of the bullfrog *Lithobates catesbeiana*. The  
383 authors conclude that tolerance to herbicide is associated with an increase in the energy demand to  
384 keep the homeostasis and ensure the animal's survival. A significant reduction in the embryo total  
385 length, a sensitive parameter of the teratogenesis assay in *Xenopus* (FETAX), was also observed in  
386 *Xenopus* embryos starting from the RU-PW concentration of 5mg a.e./L (Bonfanti et al., 2018).

387 Growth retardation may impair tadpoles' ability to swim efficiently at hatching and  
388 therefore negatively influence their chances to cope with potential predation threats. Although in  
389 our study growth retardation was only detected at 7.6 mg a.e./L, which is the worst-case scenario  
390 concentration predicted in shallow water bodies, similar effects were found in mesocosm  
391 experiments at lower concentrations (Relyea, 2005). Nonetheless, in previous studies there seems to  
392 be differences in the effects on development and survivability of tadpoles exposed to GBHs, with  
393 lower impacts generally observed in mesocosms experiments even when testing POEA containing  
394 herbicides, the most toxic surfactant for amphibians (Mikó et al., 2015).

395

#### 396 *Lateralization impairment at early developmental stages*

397

398 Among the behavioural traits investigated in this study, the intensity of lateralization seemed to be  
399 affected by exposure to glyphosate, as significant higher values were observed for the control group  
400 when compared to the experimental group raised in 7.6 mg a.e./L RU-PW. At Gosner stage 25, we  
401 discovered that lateralization index ( $L_A$ ) was lower in exposed tadpoles compared to those raised in  
402 the control solution. Laterality is linked to anti-predatory behaviour and, therefore, an alteration  
403 caused by environmental factors could lead to a decreased efficacy of defensive responses and  
404 higher larvae mortality rates.



405 To date, no study has investigated how glyphosate exposure during development might  
406 affect lateralization in early vs later life stages of amphibians' tadpoles. As Roundup® seems to  
407 activate the physiological pathway of developmental plasticity linked to anti-predator responses in  
408 tadpoles of the wood frog (*Lithobates sylvatica*), the leopard frog (*L. pipiens*) and the agile frog  
409 (*Rana dalmatina*) (Relyea, 2012; Mikó et al., 2017), and given that a higher predation risk  
410 environment during early ontogeny has been proven to lead to a higher  $L_A$  index in tadpoles in later  
411 life stages (Lucon-Xiccato et al., 2017), a higher  $L_A$  index in tadpoles treated with RU-PW during  
412 early ontogeny could have been a plausible developmental plastic response. Nonetheless, this was  
413 not the case in our experiment. RU-PW did not seem to induce behavioural and morphological  
414 adaptations linked to antipredator responses. Indeed, tadpoles raised in 7.6 mg a.e./L had a smaller  
415 tail membrane than those raised in the control solution, rather than a deeper tail membrane which is  
416 a typical morphological anti-predator change (Van Buskirk, 2001).

417 In the second session, when tadpoles reached Gosner stage 28/29, no significant differences  
418 between groups were detected although laterality was lower in all four groups with respect to the  
419 first session (Gosner 25; Fig. 2). So, it seems that the effects of RU-PW were only detectable  
420 shortly after hatching, and our results support the hypothesis that behavioural changes may be  
421 influenced by the developmental stages in which it falls (Mikó et al., 2017). To our knowledge, no  
422 study has yet explored how lateralization varies during tadpoles' development and how it can be  
423 affected by environmental factors during ontogeny. If we consider the modification of the  $L_A$  index  
424 in the control group through development, as the natural occurring variation of the intensity of  
425 lateralization, we could hypothesize that lateralization index is higher just after hatching and then  
426 decreases at later life stages. A higher  $L_A$  index at earlier life stages could help tadpoles to cope  
427 with the higher early predation threats (Dadda et al., 2010), however it seems that experience is  
428 required in order to develop a certain level of behavioural lateralization (Lucon-Xiccato et al.,  
429 2017).

430

431 *RU-PW and antipredator response*

432

433 The capacity of larval anurans to detect water borne cues produced by predators and properly alter  
434 their behaviour (e.g. hiding or reducing activity) is crucial for survival: tadpoles of many frog  
435 species are known to reduce level of activity after being exposed to predatory cues, in particular  
436 when chemicals are produced by a familiar predator preying upon conspecific prey (Moore et al.,  
437 2015). In our study, we did not detect any effect of the exposure during development regarding  
438 antipredator response both in the first and second trial sessions. This means that tadpoles raised in  
439 RU-PW solution had the ability to detect predatory and conspecific cues in a way that apparently  
440 resembles the ability of individuals raised in the control solution. Nonetheless, we cannot rule out  
441 that given the high concentration of predator and conspecific cue, any possible alternative responses  
442 of the distinct treatments could have been concealed by the triggering of a general strong decrease  
443 in the tadpole activity level. Another possibility is that the larvae of *P. ridibundus* are able to cope  
444 with the negative effect of the herbicide toxicity in ecological relevant concentrations, and  
445 particularly do not suffer shortcomings of the exposure at the sensory and nervous level. However,  
446 the observed differences in lateralization and basal activity (see section *Lateralization impairment*  
447 *at early developmental stages*) seem to support the first scenario (i.e. excess of stimulus).

448

449 *Lower basal activity in exposed tadpoles*

450

451 The dramatic decrease in basal activity observed in tadpoles exposed to RU-PW, compared to those  
452 raised in the control solution in the first experimental session, may have consequences in the  
453 survivability and ability to forage of tadpoles. Indeed, foraging is crucial for survival and tadpoles  
454 need to efficiently balance the risk of starving and the risk of predation by adjusting their activity  
455 levels (Werner and Anholt, 1996). In case of general lower basal activity, tadpoles may be impaired  
456 in the foraging activity, which translates in less energy acquisition and growth and prolonged

457 exposure to predators and water pollutants. This may result in a positive feedback cycle: higher  
458 Roundup® levels during development decreases basal activity, which may decrease foraging  
459 activity and result in lower growth rates that ultimately lead to prolonged time of exposure to water  
460 pollutants.

461 Bridges (1999) noted that tadpoles of *Hyla versicolor* exposed to carbaryl had significantly  
462 lower activity levels, even when no predator were present, than tadpoles not exposed to the  
463 herbicide. The consequence is a longer time spent in environments with less food availability since  
464 spending too much time resting may lower predation risk, but at the same time decreases energy  
465 acquisition.

466 In shallow ephemeral ponds, glyphosate concentrations are generally higher due to being located  
467 near Roundup® application and due to lack of use restrictions since they are not considered water  
468 bodies (Battaglin et al., 2009). In these environments, the reduced growth rate caused by the  
469 herbicide may increase the risk of not achieving metamorphosis before the water dries out (Bridges,  
470 1999). Furthermore, as water stratification does not occur in shallow water bodies, a phenomenon  
471 which causes glyphosate and surfactants to concentrate near the surface, the risk of exposure  
472 increases even more for the offspring of amphibians that breed in ephemeral ponds (Jones et al.,  
473 2010).

474 At Gosner stage 28/29, we observed a reduction in the basal activity of tadpoles from the  
475 control group, but no significant variation was observed among all the treatments. Despite this  
476 significant drop in activity for the control group, tadpoles raised in 7.6 mg a.e./L still showed  
477 similar activity levels to the control group in the second session. One possible explanation for the  
478 observed shift in the basal activity of tadpoles exposed to RU-PW is that the exposed tadpoles may  
479 have increased their activity to compensate the initial negative effect of the herbicide.  
480 Alternatively, the control group may have decreased its basal activity to optimize their growth and  
481 to storage the required amount of energy for further metamorphosis.

482

483 **CONCLUSIONS**

484

485 Amphibians are experiencing a decline on a global scale, mainly due to human activity (Carey and  
486 Bryant, 1995; Stuart et al., 2008). One of the main factors considered to negatively impact  
487 amphibians' conservation is the environmental pollution through pesticides employment, which are  
488 often directly applied to the soil and may contaminate the aquatic environment through leaching,  
489 wind or transported by runoff waters (Collins and Storfer, 2003; Saunders and Pezeshki, 2015).

490 Our study demonstrates that tadpoles of *P. ridibundus* are sensitive to a glyphosate-based  
491 herbicide in terms of both morphological and behavioural modifications. Tadpoles exposed  
492 developed faster at low concentrations (0.7 and 3.1 mg a.e./L), while were affected by overall  
493 growth retardation at the highest concentration tested (7.6 mg a.e./L). Lateralization and basal  
494 activity were affected by embryonic exposure to glyphosate, however we could not detect any effect  
495 on antipredator behavioural responses. Some of the observed modifications may be attributed to  
496 altered or reduced brain development, or to the inflammation and consequent infiltration of  
497 eosinophilic granule cells/mast cells in neuronal bodies, as demonstrated by previous laboratory  
498 tests involving both non-model or model organisms (Ramírez-Duarte et al., 2008; Bonfanti et al.,  
499 2018). Although our study reports the results of acute exposure to glyphosate, it can be assumed  
500 that, after prolonged exposure, the observed behavioural alterations would only worsen, making  
501 tadpoles less responsive to stressful synergetic situations such as habitat fragmentation, UV  
502 radiation, pollutants, pathogenic agents, invasive species, and predators. All these factors, among  
503 others, would contribute to the decrease of populations of this and other similar species.

504 To the best of our knowledge, this is the first study describing variation in lateralization in  
505 tadpoles of the genus *Pelophylax*, which comprise nearly 20 taxa spread throughout Europe and  
506 Asia. Noteworthy, *P. ridibundus* has been widely translocated among European countries, and it is  
507 known to hybridize with local taxa with unknown ecological consequences. In Northern Italy,  
508 where this species has undergone multiple release, hybridization with *P. lessonae* (the pool frog)

509 and particularly *P. esculentus* (the edible frog, which carries the genome of the latter two species as  
510 a result of hybridogenetic mechanisms; Berger, 1973), may eventually impact the species-specific  
511 response of native species to environmental pressures like predation in polluted environments. *P.*  
512 *ridibundus* is overall less sensitive to disturbance than the native taxa, particularly *P. lessonae*,  
513 therefore it can be assumed that observed effects of herbicide would be more evident in less tolerant  
514 tadpoles.  
515 Nonetheless, the latter statement needs to be supported by further studies, in order to clarify if  
516 marsh frogs may be further advantaged on native taxa via pollutant resistance.

517 Finally, since aquatic environments are essential to both the life cycle of amphibians and  
518 their reproductive success, in this study we supported the hypothesis that water contamination may  
519 greatly impair the survivability of amphibian populations.

520

## 521 **Acknowledgements**

522

523 We thank F. Pupin and A. Bianchi for helping in fieldwork activity, and S. Seghizzi for her support  
524 in laboratory analysis. Permission for frog collection and suppression were granted to A. Bellati by  
525 the Italian Ministry of the Environment under Prot. N. 0003221.15-02-2017.

526

## 527 **References**

528

529 Altig, R., 2007. A primer for the morphology of anuran tadpoles. *Herpetol. Cons. Biol.* 2, 71-74.

530 Altwegg, R., Reyer, H.U., 2003. Patterns of natural selection on size at metamorphosis in water

531 frogs. *Evolution* 57, 872-882. <https://doi.org/10.1554/0014->

532 [3820\(2003\)057\[0872:ponso\]2.0.co;2](https://doi.org/10.1554/0014-3820(2003)057[0872:ponso]2.0.co;2)

533 Bailey, D.C., Todt, C.E., Burchfield, S.L., Pressley, A.S., Denney, R.D., Snapp, I.B., Negga, R.,

534 Traynor, W.L., Fitsanakis, V.A., 2018. Chronic exposure to a glyphosate-containing pesticide

- 535 leads to mitochondrial dysfunction and increased reactive oxygen species production in  
536 *Caenorhabditis elegans*. *Environ. Toxicol. Pharmacol.* 57, 46-52.  
537 <https://doi.org/10.1016/j.etap.2017.11.005>
- 538 Battaglin, W.A., Rice, K.C., Focazio, M.J., Salmons, S., Barry, R.X., 2009. The occurrence of  
539 glyphosate, atrazine, and other pesticides in vernal pools and adjacent streams in  
540 Washington, DC, Maryland, Iowa, and Wyoming, 2005–2006. *Environ. Monit. Ass.* 155,  
541 281-307. <https://doi.org/10.1007/s10661-008-0435-y>
- 542 Berger, L., 1973. Systematics and hybridisation in European green frogs of *Rana esculenta*  
543 complex. *J. Herpetol.* 7, 1-10. <https://doi.org/10.2307/1562822>
- 544 Berger, L., Rybacki, M., Hotz, H., 1994. Artificial fertilization of water frogs. *Amphibia-*  
545 *Reptilia* 15, 408-413. <https://doi.org/10.1163/156853894x00452>
- 546 Besson, M., Gache, C., Bertucci, F., Brooker, R.M., Roux, N., Jacob, H., Lecchini, D., 2017.  
547 Exposure to agricultural pesticide impairs visual lateralization in a larval coral reef fishes.  
548 *Sci. Rep.* 7, 9165. <https://doi.org/10.1038/s41598-017-09381-0>
- 549 Bisazza, A., Rogers, L.J., Vallortigara, G., 1998. The origin of cerebral asymmetry: a review of  
550 evidence of behavioral and brain lateralization in fishes, reptiles and amphibians. *Neurosci.*  
551 *Biobehav. Rev.* 22, 411-426. [https://doi.org/10.1016/s0149-7634\(97\)00050-x](https://doi.org/10.1016/s0149-7634(97)00050-x)
- 552 Bonfanti, P., Colombo, A., Orsi, F., Nizzetto, I., Andrioletti, M., Bacchetta, R., Mantecca, P., Fascio,  
553 U., Vailati, G., Vismara, C., 2004. Comparative teratogenicity of Chlorpyrifos and Malathion  
554 on development. *Aquat. Toxicol.* 70, 189-200. <https://doi.org/10.1016/j.aquatox.2004.09.007>
- 555 Bonfanti, P., Saibene, M., Bacchetta, R., Mantecca, P., Colombo, A., 2018. A glyphosate micro-  
556 emulsion formulation displays teratogenicity in *Xenopus laevis*. *Aquat. Toxicol.* 195, 103-  
557 113. <https://doi.org/10.1016/j.aquatox.2017.12.007>
- 558 Borggaard, O.K., Gimsing, A.L., 2008. Fate of glyphosate in soil and the possibility of leaching to  
559 ground and surface waters: a review. *Pest Manag. Sci.* 64, 441-456.  
560 <https://doi.org/10.1002/ps.1512>

- 561 Bridges, C.M., 1999. Effects of a pesticide on tadpole activity and predator avoidance behavior. J.  
562 Herpetol. 33, 303-306. <https://doi.org/10.2307/1565728>
- 563 Bridi, D., Altenhofen, S., Gonzalez, J.B., Reolon, G.K., Bonan, C.D., 2017. Glyphosate and  
564 Roundup® alter morphology and behavior in zebrafish. Toxicology 392, 32-39.  
565 <https://doi.org/10.1016/j.tox.2017.10.007>
- 566 Cantalupo, C., Bisazza, A., Vallortigara, G., 1995. Lateralization of predator-evasion response in a  
567 teleost fish (*Girardinus falcatus*). Neuropsychologia 33, 1637-1646.  
568 [https://doi.org/10.1016/0028-3932\(95\)00043-7](https://doi.org/10.1016/0028-3932(95)00043-7)
- 569 Carey, C., Bryant, C.J., 1995. Possible interrelations among environmental toxicants, amphibian  
570 development, and decline of amphibian populations. Environ. Heal. Persp. 103, 13-17.  
571 <https://doi.org/10.2307/3432406>
- 572 Cauble, K., Wagner, R.S., 2005. Sublethal effects of the herbicide glyphosate on amphibian  
573 metamorphosis and development. Bull. Environ. Contam. Toxicol. 75, 429-435.  
574 <https://doi.org/10.1007/s00128-005-0771-3>
- 575 Collins, J.P., Storfer, A., 2003. Global amphibian declines: sorting the hypotheses. Div. Distrib., 9  
576 89-98. <https://doi.org/10.1046/j.1472-4642.2003.00012.x>
- 577 Dadda, M., Domenichini, A., Piffer, L., Argenton, F., Bisazza, A., 2010. Early differences in  
578 epthalamic left–right asymmetry influence lateralization and personality of adult  
579 zebrafish. Behav. Brain Res. 206, 208-215. <https://doi.org/10.1016/j.bbr.2009.09.019>
- 580 Davidson, R.J., Hugdahl, K., 1996. Brain Asymmetry, MIT Press, Cambridge, MA.
- 581 Dawson, D.A., Bantle, J.A., 1987. Development of a reconstituted water medium and preliminary  
582 validation of the frog embryo teratogenesis assay—*Xenopus* (FETAX). J. Appl. Toxicol. 7,  
583 237-244. <https://doi.org/10.1002/jat.2550070403>
- 584 Dill, G.M., 2005. Glyphosate-resistant crops: history, status and future. Pest Manag. Sci. 61, 219-  
585 224. <https://doi.org/10.1002/ps.1008>

- 586 Dill, G.M., Sammons, R.D., Feng, P.C.C., Kohn, F., Kretzmer, K., Mehrsheikh, A., Bleeke, M.,  
587 Honegger, J.L., Farmer, D., Wright, D., Hauptfear, E.A., 2010. Glyphosate: discovery,  
588 development, applications, and properties. Chapter 1, in: Nandula, V.K. (Ed.), Glyphosate  
589 resistance in crops and weeds: history, development, and management. Wiley, New York, pp.  
590 1-33. <https://doi.org/10.1002/9780470634394.ch1>
- 591 Dornelles, M.F., Oliveira, G.T., 2014. Effect of atrazine, glyphosate and quinclorac on biochemical  
592 parameters, lipid peroxidation and survival in bullfrog tadpoles (*Lithobates*  
593 *catesbeianus*). Arch. Environ. Contam. Toxicol. 66, 415-429.  
594 <https://doi.org/10.1007/s00244-013-9967-4>
- 595 Dufty Jr, A.M., Clobert, J., Møller, A.P., 2002. Hormones, developmental plasticity and  
596 adaptation. Trends Ecol. Evol. 17, 190-196. [https://doi.org/10.1016/s0169-5347\(02\)02498-9](https://doi.org/10.1016/s0169-5347(02)02498-9)
- 597 Duke, S.O., Powles, S.B., 2008. Glyphosate: a once-in-a-century herbicide. Pest Manag. Sci. 64,  
598 319-325. <https://doi.org/10.1002/ps.1518>
- 599 Edginton, A.N., Sheridan, P.M., Stephenson, G.R., Thompson, D.G., Boermans, H.J., 2004.  
600 Comparative effects of pH and Vision® herbicide on two life stages of four anuran species.  
601 Environ. Toxicol. Chem. 23, 815-822. <https://doi.org/10.1897/03-115>
- 602 European Commission, 2017. [https://ec.europa.eu/food/plant/pesticides/glyphosate\\_en](https://ec.europa.eu/food/plant/pesticides/glyphosate_en)
- 603 Feng, J.C., Thompson, D.G., Reynolds, P.E., 1990. Fate of glyphosate in a Canadian forest  
604 watershed. 1. Aquatic residues and off-target deposit assessment. J. Agric. Food Chem. 38,  
605 1110-1118. <https://doi.org/10.1021/jf00094a045>
- 606 Ferrari, M.C., Chivers, D.P., 2009. Temporal variability, threat sensitivity and conflicting  
607 information about the nature of risk: understanding the dynamics of tadpole antipredator  
608 behaviour. Anim. Behav. 78, 11-16. <https://doi.org/10.1016/j.anbehav.2009.03.016>
- 609 Giesy, J.P., Dobson, S., Solomon, K.R., 2000. Ecotoxicological risk assessment for Roundup®  
610 herbicide. Rev. Environ. Toxicol. 167, 35-120. [https://doi.org/10.1007/978-1-4612-1156-3\\_2](https://doi.org/10.1007/978-1-4612-1156-3_2)



- 611 Gill, J.P.K., Sethi, N., Mohan, A., Datta, S., Girdhar, M., 2018. Glyphosate toxicity for animals.  
612 Environ. Chem. Lett. 16, 401-426. <https://doi.org/10.1007/s10311-017-0689-0>
- 613 Gosner, K.L., 1960. A simplified table for staging anuran embryos and larvae with notes on  
614 identification. Herpetologica 16, 183-190.
- 615 Grube, A., Donaldson, D., Kiely, T., Wu, L., 2011. Pesticides Industry Sales and Usage: 2006 and  
616 2007 Market Estimates, in: United States Environmental Protection Agency (Ed.).  
617 Biological and Economic Analysis Division, Office of Pesticide Programs.
- 618 Güngördü, A., 2013. Comparative toxicity of methidathion and glyphosate on early life stages of  
619 three amphibian species: *Pelophylax ridibundus*, *Pseudepidalea viridis*, and *Xenopus laevis*.  
620 Aquat. Toxicol. 140, 220-228. <https://doi.org/10.1016/j.aquatox.2013.06.012>
- 621 Hettyey, A., Tóth, Z., Thonhauser, K.E., Frommen, J.G., Penn, D.J., Van Buskirk, J., 2015. The  
622 relative importance of prey-borne and predator-borne chemical cues for inducible  
623 antipredator responses in tadpoles. Oecologia 179, 699-710. [https://doi.org/10.1007/s00442-](https://doi.org/10.1007/s00442-015-3382-7)  
624 [015-3382-7](https://doi.org/10.1007/s00442-015-3382-7)
- 625 Holtfreter, J., 1944. A study of the mechanics of gastrulation. J. Exp. Zool. 95, 171-212.  
626 <https://doi.org/10.1002/jez.1400940302>
- 627 ISPRA, 2018. Rapporto nazionale pesticidi nelle acque, dati 2015-2016, Rapporti 282/2018.
- 628 Italian Ministry of Health, 2016. Ulteriori revoche di autorizzazioni all'immissione in commercio e  
629 modifica delle condizioni d'impiego di prodotti fitosanitari contenenti la sostanza attiva  
630 "glifosate" in attuazione del regolamento di esecuzione (UE) 2016/1313 della Commissione  
631 del 1° agosto 2016 e modifica all'allegato 1 del Decreto, Decreto 16 agosto 2016.
- 632 James, S.M., Little, E.E., 2003. The effects of chronic cadmium exposure on American toad (*Bufo*  
633 *americanus*) tadpoles. Environ. Toxicol. Chem. 22, 377-380. [https://doi.org/10.1897/1551-](https://doi.org/10.1897/1551-5028(2003)022%3C0377:teocce%3E2.0.co;2)  
634 [5028\(2003\)022%3C0377:teocce%3E2.0.co;2](https://doi.org/10.1897/1551-5028(2003)022%3C0377:teocce%3E2.0.co;2)

- 635 Jones, D.K., Hammond, J.I., Relyea, R.A., 2010. Roundup® and amphibians: the importance of  
636 concentration, application time, and stratification. *Environ. Toxicol. Chem.* 29, 2016-2025.  
637 <https://doi.org/10.1002/etc.240>
- 638 Koboroff, A., Kaplan, G., Rogers, L.J., 2008. Hemispheric specialization in Australian magpies  
639 (*Gymnorhina tibicen*) shown as eye preferences during response to a predator. *Brain Res.*  
640 *Bull.* 76, 304-306. <https://doi.org/10.1016/j.brainresbull.2008.02.015>
- 641 Kumschick, S., Measey, G.J., Vimercati, G., De Villiers, F.A., Mokhatla, M.M., Davies, S.J., Thorp,  
642 C.J., Rebelo, A.D., Blackburn, T.M., Kraus, F., 2017. How repeatable is the Environmental  
643 Impact Classification of Alien Taxa (EICAT)? Comparing independent global impact  
644 assessments of amphibians. *Ecol. Evol.* 7, 2661-2670. <https://doi.org/10.1002/ece3.2877>
- 645 Lajmanovich, R.C., Attademo, A.M., Peltzer, P.M., Junges, C.M., Cabagna, M.C., 2011. Toxicity of  
646 four herbicide formulations with glyphosate on *Rhinella arenarum* (Anura: Bufonidae)  
647 tadpoles: B-esterases and glutathione s-transferase inhibitors. *Arch. Environ. Contam.*  
648 *Toxicol.* 60, 681-689. <https://doi.org/10.1007/s00244-010-9578-2>
- 649 Lancôt, C., Navarro-Martín, L., Robertson, C., Park, B., Jackman, P., Pauli, B.D., Trudeau, V.L.,  
650 2014. Effects of glyphosate-based herbicides on survival, development, growth and sex  
651 ratios of wood frog (*Lithobates sylvaticus*) tadpoles. II: agriculturally relevant exposures to  
652 Roundup WeatherMax® and Vision® under laboratory conditions. *Aquat. Toxicol.* 154, 291-  
653 303. <https://doi.org/10.1016/j.aquatox.2014.05.025>
- 654 Lanza, B., Andreone, F., Bologna, M.A., Corti, C., Razzetti, E., 2006. *Fauna d'Italia: Amphibia.*  
655 Calderini, Bologna.
- 656 Lenth, R., 2018. Emmeans: Estimated marginal means. Aka Least-squares Means, R.  
657 <https://CRAN.R-project.org/package=emmeans>
- 658 Lucon-Xiccato, T., Chivers, D.P., Mitchell, M.D., Ferrari, M.C., 2016. Prenatal exposure to  
659 predation affects predator recognition learning via lateralization plasticity. *Behav. Ecol.* 28,  
660 253-259. <https://doi.org/10.1093/beheco/arw155>

- 661 Mair, P., Wilcox, R., 2016. Robust statistical methods in r using the wrs2 package. Behav. Res.  
662 Methods 2019, 1-25. <https://doi.org/10.3758/s13428-019-01246-w>
- 663 Mandrillon, A.L, Saglio, P., 2007. Herbicide exposure affects the chemical recognition of a non  
664 native predator in common toad tadpoles (*Bufo bufo*). Chemoecology 17, 31-36.  
665 <https://doi.org/10.1007/s00049-006-0354-8>
- 666 Martín, J., Lopez, P., Bonati, B., Csermely, D., 2010. Lateralization when monitoring predators in  
667 the wild: a left eye control in the common wall lizard (*Podarcis muralis*). Ethology 116,  
668 1226-1233. <https://doi.org/10.1111/j.1439-0310.2010.01836.x>
- 669 Menéndez-Helman, R.J., Ferreyroa, G.V., dos Santos Afonso, M., Salibián, A., 2012. Glyphosate as  
670 an acetylcholinesterase inhibitor in *Cnesterodon decemmaculatus*. Bull. Environ. Contam.  
671 Toxicol. 88, 6-9. <https://doi.org/10.1007/s00128-011-0423-8>
- 672 Mikó, Z., Ujszegi, J., Gál, Z., Imrei, Z., Hettyey, A., 2015. Choice of experimental venue matters in  
673 ecotoxicology studies: comparison of a laboratory-based and an outdoor mesocosm  
674 experiment. Aquat. Toxicol. 167, 20-30. <https://doi.org/10.1016/j.aquatox.2015.07.014>
- 675 Mikó, Z., Ujszegi, J., Gál, Z., Hettyey, A., 2017. Effects of a glyphosate-based herbicide and  
676 predation threat on the behaviour of agile frog tadpoles. Ecotoxicol. Environ. Saf. 140, 96-  
677 102. <https://doi.org/10.1016/j.ecoenv.2017.02.032>
- 678 Moore, H., Chivers, D.P, Ferrari, M.C.O., 2015. Sub-lethal effects of Roundup™ on tadpole anti-  
679 predator responses. Ecotoxicol. Environ. Saf. 111, 281-285.  
680 <https://doi.org/10.1016/j.ecoenv.2014.10.014>
- 681 Moore, L.J., Fuentes, L., Rodgers, J.H., Bowerman, W.W., Yarrow, G.K., Chao, W.Y., Bridges,  
682 W.C., 2012. Relative toxicity of the components of the original formulation of Roundup® to  
683 five north American anurans. Ecotoxicol. Environ. Saf. 78, 128-133.  
684 <https://doi.org/10.1016/j.ecoenv.2011.11.025>

- 685 Nations, S., Wages, M., Cañas, J.E., Maul, J., Theodorakis, C., Cobb, G.P., 2011. Acute effects of  
686 Fe<sub>2</sub>O<sub>3</sub>, TiO<sub>2</sub>, ZnO and CuO nanomaterials on *Xenopus laevis*. *Chemosphere* 83, 1053-1061.  
687 <https://doi.org/10.1016/j.chemosphere.2011.01.061>
- 688 Nations, S., Long, M., Wages, M., Maul, J.D., Theodorakis, C.W., Cobb, G.P., 2015. Subchronic  
689 and chronic developmental effects of copper oxide (CuO) nanoparticles on *Xenopus*  
690 *laevis*. *Chemosphere* 135, 166-174. <https://doi.org/10.1016/j.chemosphere.2015.03.078>
- 691 Navarro-Martín, L., Lanctôt, C., Jackman, P., Park, B.J., Doe, K., Pauli, B.D., Trudeau, V.L., 2014.  
692 Effects of glyphosate-based herbicides on survival, development, growth and sex ratios of  
693 wood frogs (*Lithobates sylvaticus*) tadpoles. I Chronic laboratory exposures to VisionMax®.  
694 *Aquat. Toxicol.* 154, 278-290. <https://doi.org/10.1016/j.aquatox.2014.05.017>
- 695 Paganelli, A., Gnazzo, V., Acosta, H., López, S.L., Carrasco, A.E., 2010. Glyphosate-based  
696 herbicides produce teratogenic effects on vertebrates by impairing retinoic acid signaling.  
697 *Chem. Res. Toxicol.* 23, 1586-1595. <https://doi.org/10.1021/tx1001749>
- 698 Păunescu, A., Ponopal, C.M., 2011. Effect of roundup® herbicide on physiological indices in marsh  
699 frog *Pelophylax ridibundus*. *Sci. Pap. UASVM Bucharest, Ser. A* 54, 269-274.
- 700 Pellitteri-Rosa, D., Gazzola, A., 2018. Context-dependent behavioural lateralization in the European  
701 pond turtle *Emys orbicularis* (Testudines, Emydidae). *J. Exp. Biol.* 221, jeb186775.  
702 <https://doi.org/10.1242/jeb.186775>
- 703 Pruvost, N.B., 2013. Impact of gamete production on breeding systems and population structure of  
704 hybridogenetic frogs of the “*Pelophylax esculentus*” complex: the evolutionary potential of  
705 interspecific hybridization, University of Zurich, Doctoral thesis.
- 706 Ramírez-Duarte, W.F., Rondón-Barragán, I.S., Eslava-Mocha, P.R., 2008. Acute toxicity and  
707 histopathological alterations of Roundup® herbicide on “cachama blanca” (*Piaractus*  
708 *brachypomus*). *Pesq. Vet. Brasil.* 28, 547-554. [https://doi.org/10.1590/s0100-](https://doi.org/10.1590/s0100-736x2008001100002)  
709 [736x2008001100002](https://doi.org/10.1590/s0100-736x2008001100002)

- 710 Relyea, R.A., 2005. The lethal impacts of Roundup and predatory stress on six species of North  
711 American tadpoles. *Arch. Environ. Contam. Toxicol.* 48, 351-357.  
712 <https://doi.org/10.1007/s00244-004-0086-0>
- 713 Relyea, R.A., 2012. New effects of Roundup on amphibians: Predators reduce herbicide mortality;  
714 herbicides induce antipredator morphology. *Ecol. Appl.* 22, 634-647.  
715 <https://doi.org/10.1890/11-0189.1>
- 716 Salva, O.R., Regolin, L., Vallortigara, G., 2012. Inversion of contrast polarity abolishes spontaneous  
717 preferences for face-like stimuli in newborn chicks. *Behav. Brain Res.* 228, 133-143.  
718 <https://doi.org/10.1016/j.bbr.2011.11.025>
- 719 Saunders, L., Pezeshki, R., 2015. Glyphosate in runoff waters and in the root-zone: a  
720 review. *Toxics* 3, 462-480. <https://doi.org/10.3390/toxics3040462>
- 721 Shibasaki, M., Nagumo, S., Koda, H., 2014. Japanese monkeys (*Macaca fuscata*) spontaneously  
722 associate alarm calls with snakes appearing in the left visual field. *J. Comp. Psychol.* 128,  
723 332-335. <https://doi.org/10.1037/a0036049>
- 724 Siniscalchi, M., Sasso, R., Pepe, A.M., Vallortigara, G., Quaranta, A., 2010. Dogs turn left to  
725 emotional stimuli. *Behav. Brain Res.* 208, 516-521.  
726 <https://doi.org/10.1016/j.bbr.2009.12.042>
- 727 Smith, G.R., 2001. Effects of acute exposure to a commercial formulation of glyphosate on the  
728 tadpoles of two species of anurans. *Bull. Environ. Contam. Toxicol.* 67, 483-488.  
729 <https://doi.org/10.1007/s00128-001-0149-0>
- 730 Smith, G.R., Vaala, D.A., Dingfelder, H.A., Temple, K.G., 2004. Effects of nitrite on bullfrog (*Rana*  
731 *catesbeiana*) tadpoles from central Ohio, USA. *Bull. Environ. Contam. Toxicol.* 72, 1012-  
732 1016. <https://doi.org/10.1007/s00128-004-0344-x>
- 733 Sovrano, V.A., Dadda, M., Bisazza, A., 2005. Lateralized fish perform better than nonlateralized  
734 fish in spatial reorientation tasks. *Behav. Brain Res.* 163, 122-127.  
735 <https://doi.org/10.1016/j.bbr.2005.04.012>

- 736 Stuart, S.N., Hoffmann, M., Chanson, J.S., Cox, N.A., Berridge, R.J., Ramani, P., Young, B.E.,  
737 2008. Threatened amphibians of the world, Lynx Edicions, Barcelona.
- 738 Tierney, K.B., Ross, P.S., Jarrard, H.E., Delaney, K.R., Kennedy, C.J., 2006. Changes in juvenile  
739 coho salmon electro-olfactogram during and after short-term exposure to current-use  
740 pesticides. *Environ. Toxicol. Chem.* 25, 2809-2817. <https://doi.org/10.1897/05-629r1.1>
- 741 Tripathi, A., Srivastava, U.C., 2010. Acetylcholinesterase: a versatile enzyme of nervous  
742 system. *Annals Neurosci.* 15, 106-111. <https://doi.org/10.5214/ans.0972.7531.2008.150403>
- 743 Vallortigara, G., Rogers, L.J., 2005. Survival with an asymmetrical brain: advantages and  
744 disadvantages of cerebral lateralization. *Behav. Brain Sci.* 28, 575-589.  
745 <https://doi.org/10.1017/s0140525x05000105>
- 746 Van Buskirk, J., 2001. Specific induced responses to different predator species in anuran larvae. *J.*  
747 *Evol. Biol.* 14, 482-489. <https://doi.org/10.1046/j.1420-9101.2001.00282.x>
- 748 Vandenberg, L.N., Levin, M., 2013. A unified model for left–right asymmetry? Comparison and  
749 synthesis of molecular models of embryonic laterality. *Develop. Biol.* 379, 1-15.  
750 <https://doi.org/10.1016/j.ydbio.2013.03.021>
- 751 Wagner, N., Reichenbecher, W., Teichmann, H., Tappeser, B., Lötters, S., 2013. Questions  
752 concerning the potential impact of glyphosate-based herbicides on amphibians. *Environ.*  
753 *Toxicol. Chem.* 32, 1688-1700. <https://doi.org/10.1002/etc.2268>
- 754 Werner, E.E., Anholt, B.R., 1996. Predator-induced behavioral indirect effects: consequences to  
755 competitive interactions in anuran larvae. *Ecology* 77, 157-169.  
756 <https://doi.org/10.2307/2265664>
- 757 Wilcox, R.R., 2011. Introduction to robust estimation and hypothesis testing, Academic Press.
- 758 Wilkens, A.L., Valgas, A.A., Oliveira, G.T., 2019. Effects of ecologically relevant concentrations of  
759 Boral® 500 SC, Glifosato® Biocarb, and a blend of both herbicides on markers of  
760 metabolism, stress, and nutritional condition factors in bullfrog tadpoles. *Environ. Sci. Poll.*  
761 *Res.* 2019, 1-15. <https://doi.org/10.1007/s11356-019-05533-z>

762 Zimmerman, G., Soreq, H., 2006. Termination and beyond: acetylcholinesterase as a modulator of  
763 synaptic transmission. *Cell Tiss. Res.* 326, 655-669. <https://doi.org/10.1007/s00441-006->  
764 0239-8

765 **Table 1:** Results from Robust ANCOVA analysis (20% trimmed means, bootstrap = 10.000). The *design points* are total length (covariate) values  
766 ( $\mu\text{m}$ ) for which the relationship between total length and maximum tail height are comparable in the compared groups. *N1* and *N2* are the number of  
767 individuals that have a covariate value close to the *design points*. The *difference* column shows the difference in the trimmed means for the  
768 maximum tail height between the two groups and the test statistic values are stored in the *F* column (*difference/S.E.*) with the corresponding *p*-  
769 values in the *P* column. 95% confidence intervals are in the *LCI95%* (lower) and *UCI95%* (upper).  
770

|               | <i>design points</i> | <i>N1</i> | <i>N2</i> | <i>difference</i> | <i>LCI 95%</i> | <i>UCI 95%</i> | <i>F</i> | <i>P</i>       |
|---------------|----------------------|-----------|-----------|-------------------|----------------|----------------|----------|----------------|
| <i>C – T1</i> | 5612.60              | 32        | 14        | -53.97            | -127.37        | 19.43          | -2.17    | < 0.05         |
|               | 5736.65              | 36        | 22        | -58.16            | -128.33        | 12.00          | -2.44    | < 0.05         |
|               | 5958.68              | 40        | 33        | -59.99            | -136.11        | 16.12          | -2.32    | < 0.05         |
|               | 6221.33              | 28        | 42        | -25.74            | -107.76        | 56.28          | -0.93    | 0.37           |
|               | 6734.02              | 13        | 16        | -3.42             | -104.86        | 98.02          | -0.09    | 0.92           |
| <i>C – T2</i> | 5690.44              | 33        | 12        | -86.17            | -149.54        | -22.80         | -3.86    | <0.001         |
|               | 5854.84              | 42        | 23        | -54.98            | -115.72        | 5.75           | -2.57    | < 0.05         |
|               | 6018.72              | 40        | 35        | -43.00            | -114.78        | 28.77          | -1.70    | 0.10           |
|               | 6265.36              | 27        | 35        | 12.17             | -69.08         | 93.43          | 0.43     | 0.67           |
|               | 6691.35              | 13        | 13        | 11.71             | -92.27         | 115.68         | 0.32     | 0.75           |
| <i>C – T3</i> | 5512.82              | 27        | 20        | 272.15            | 200.15         | 345.05         | 10.58    | < <b>0.001</b> |
|               | 5631.46              | 33        | 32        | 283.85            | 223.67         | 344.03         | 13.27    | < <b>0.001</b> |
|               | 5735.77              | 36        | 36        | 287.59            | 225.15         | 350.03         | 12.95    | < <b>0.001</b> |
|               | 5894.17              | 43        | 25        | 301.28            | 234.04         | 368.51         | 12.61    | < <b>0.001</b> |
|               | 6018.72              | 40        | 17        | 303.48            | 233.18         | 373.78         | 12.14    | < <b>0.001</b> |



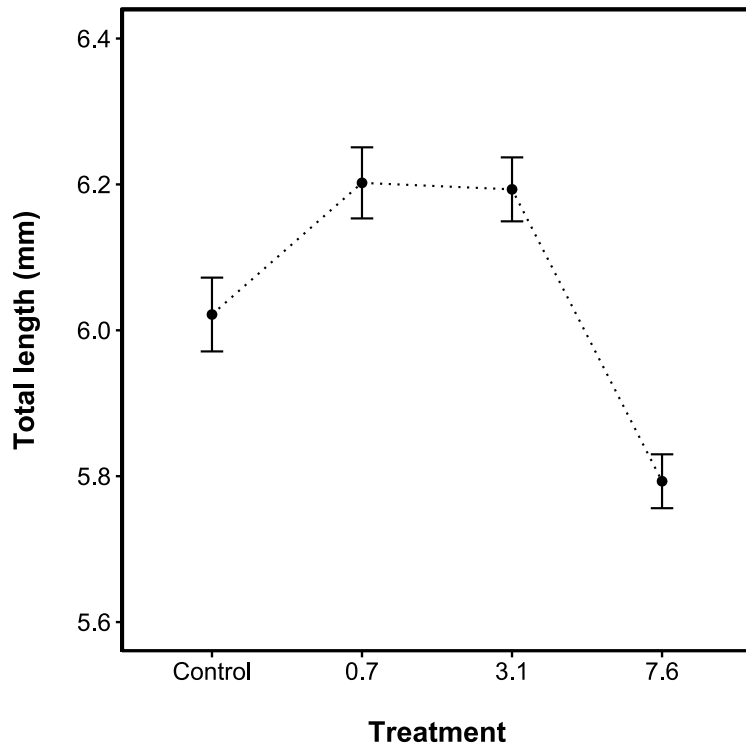

771

772

773 **Figure 1:** Mean  $\pm$  S.E. of total length in the four treatment groups. Dashed line highlights the  
774 hormetic effect of RU-PW on the growth rate. Concentrations are reported in mg a.e./L.

775

776

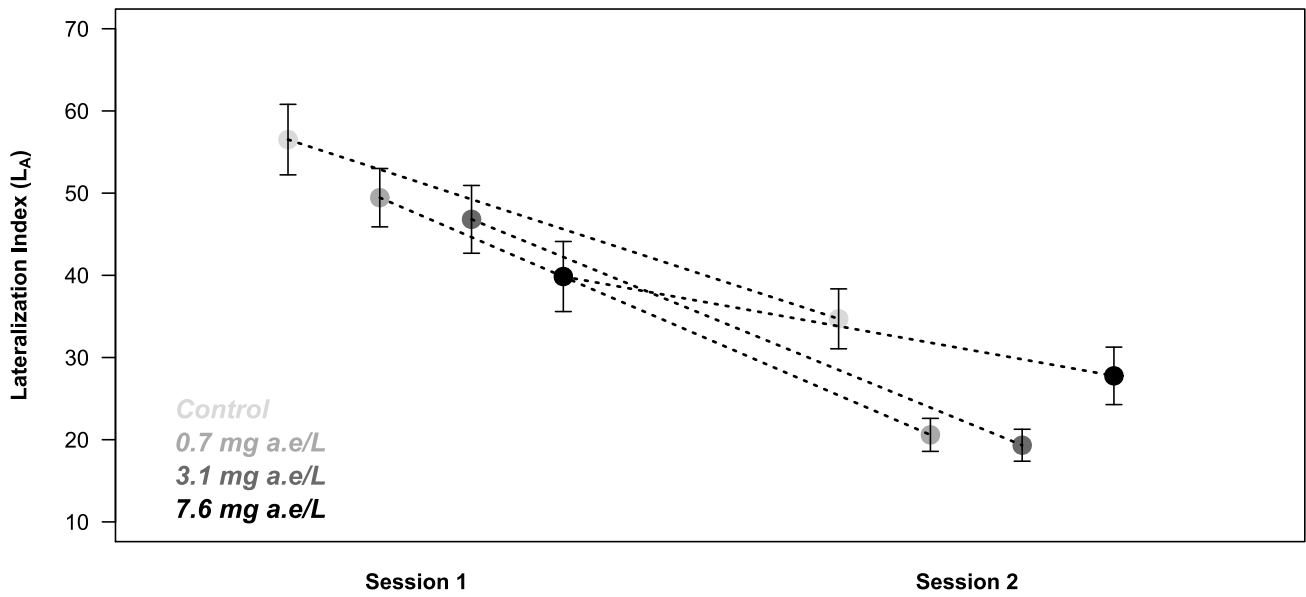

777

778

779

780 **Figure 2:**  $L_A$  index for all groups in the first and second trial session. Values are mean  $\pm$  S.E.

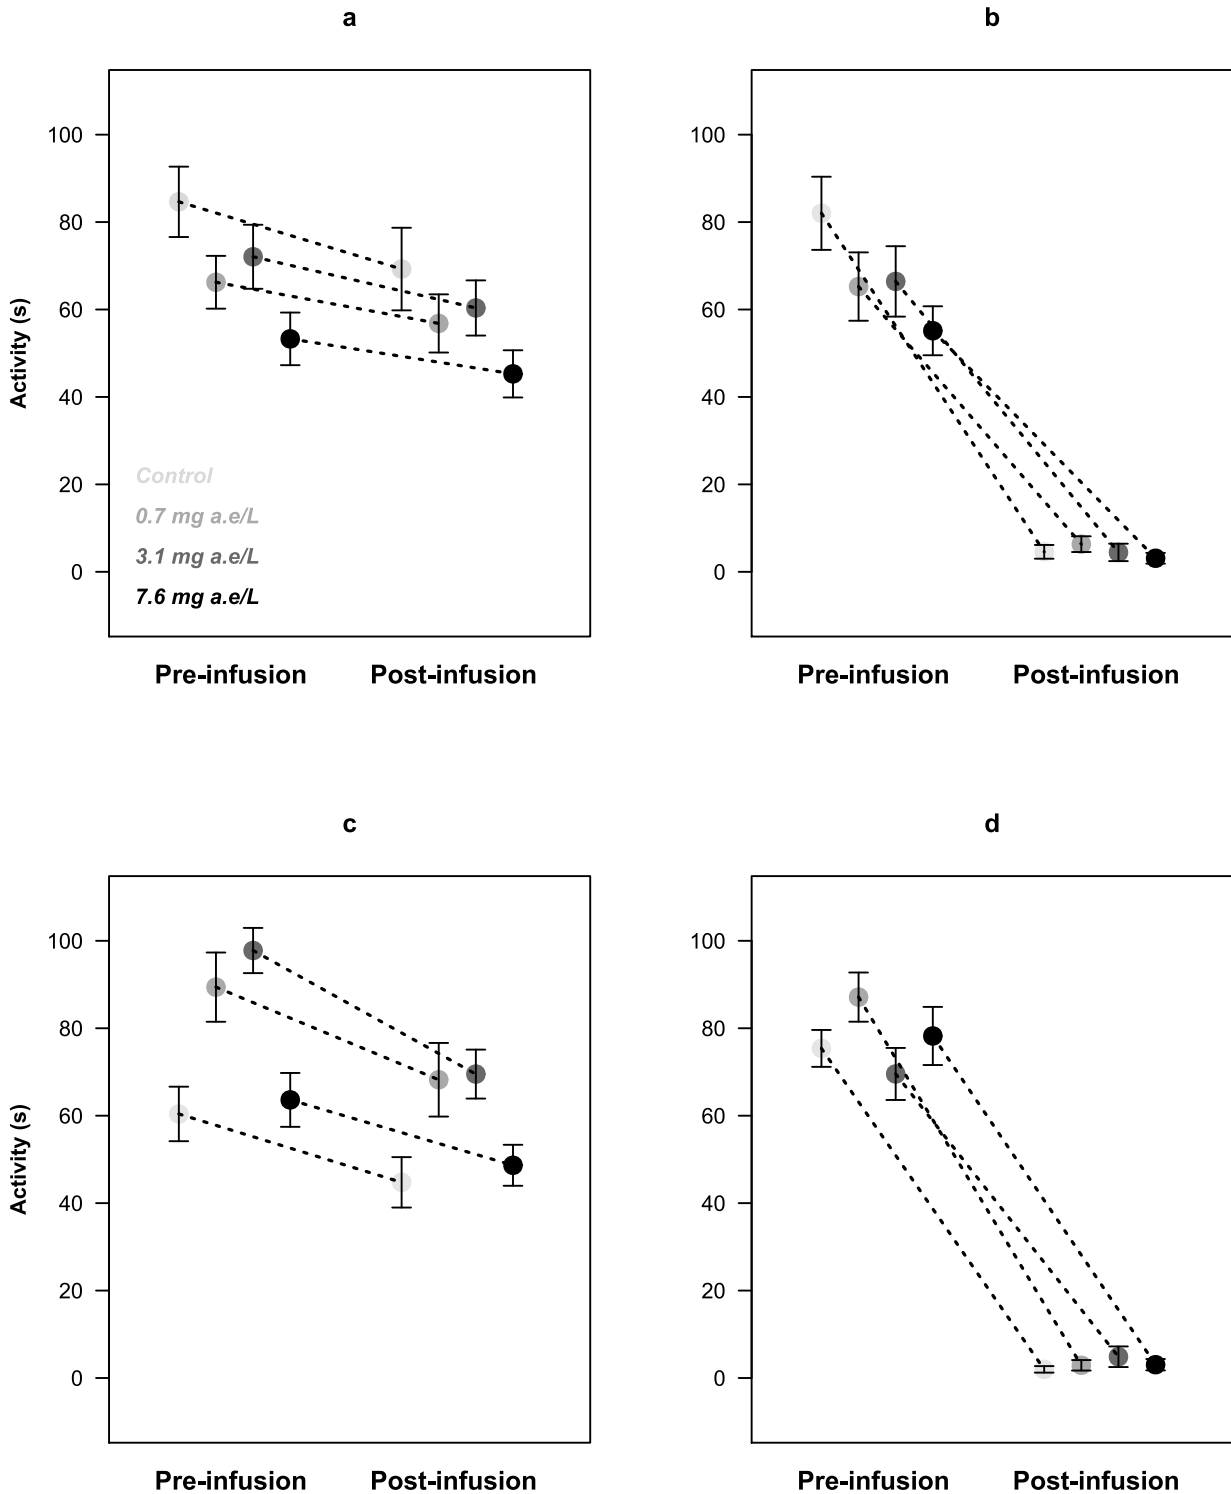

781

782

783 **Figure 3:** Activity before and after injection of water (a, c), predatory and conspecific cue (b, d) in

784 the first (a, b) and the second session (c, d).

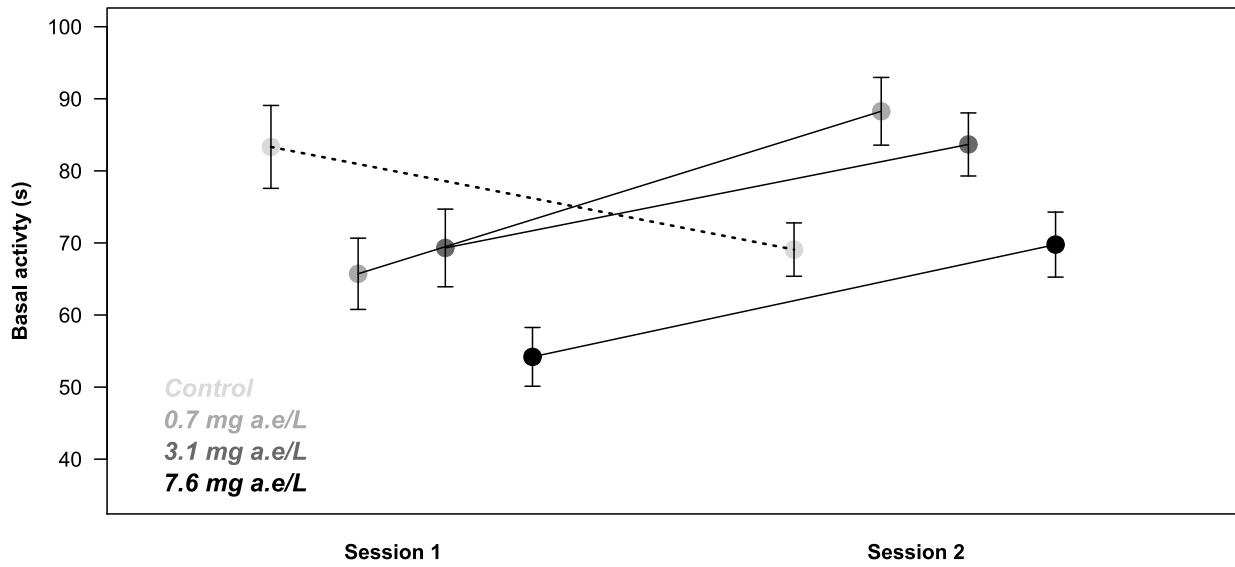

785

786

787 **Figure 4:** Basal activity levels (in seconds) for both sessions. Values are mean  $\pm$  S.E.

788

789

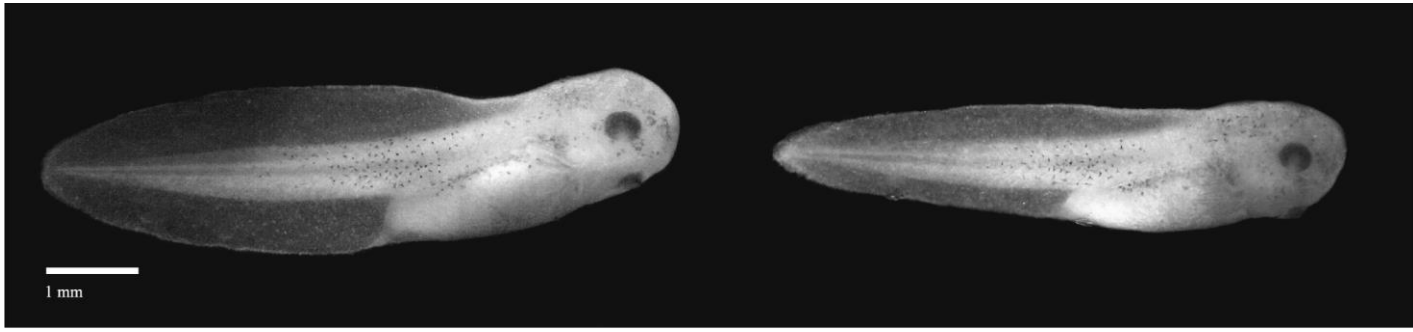

790

791

792 **Figure 5:** Lateral view of tadpoles after the 96h exposure from the control group (left) and RU-PW

793 7.6 mg a.e./L (right) showing the difference in maximum tail height.
